# Supplementary material
Source: Frontiers journal article supplement (https://www.frontiersin.org/articles/512794)
Supplement: Image_1.pdf [file Image_1.pdf]

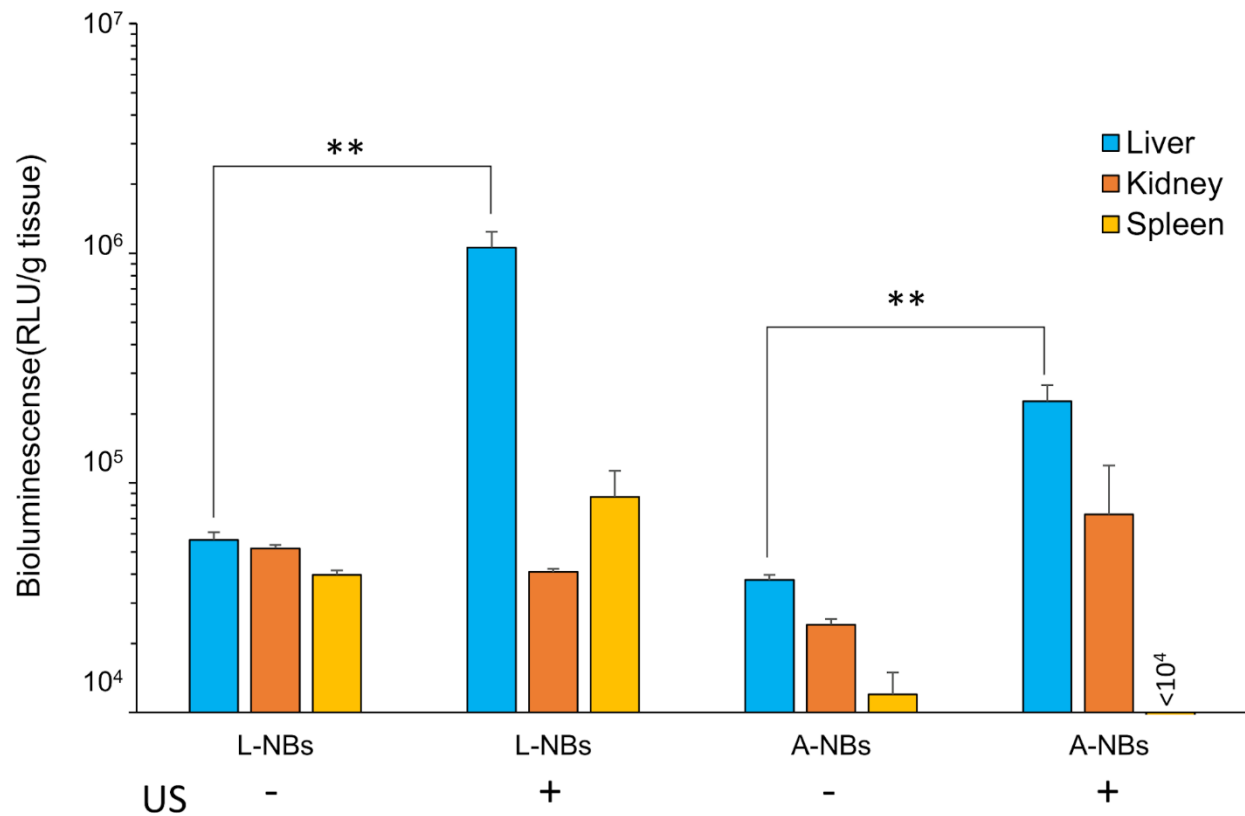

**Figure S1.** Luciferase activity (RLU/g tissue) was measured different organ tissues in mice, 6hrs after intravenous injection of gene and ultrasound irradiation (KTAC-4000, NepaGene, Chiba, JP). Ultrasound frequency: 1.0MHz, Intensity 1.0W/cm<sup>2</sup>, Duty ratio 50%, Pulse repetition frequency 10Hz, irradiation time 30sec. Data was analyzed using unpaired t-test including Welch's correction. A probability value of P<0.05 was considered statistically significant. (n=4)
